# Supplementary material
Source: Springer Nature journal article supplement (https://www.springermedizin.de/resource/supplementary/12993_2011_371_MOESM3_ESM.pdf/9617712)

**A $\beta$  (1-42)**

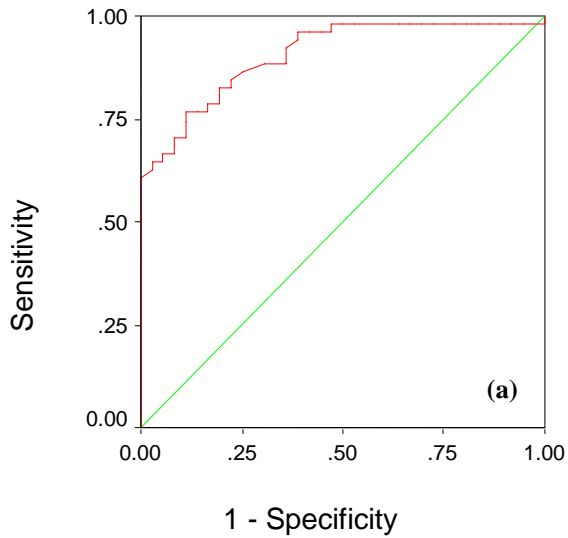

**A $\beta$  (40/42)**

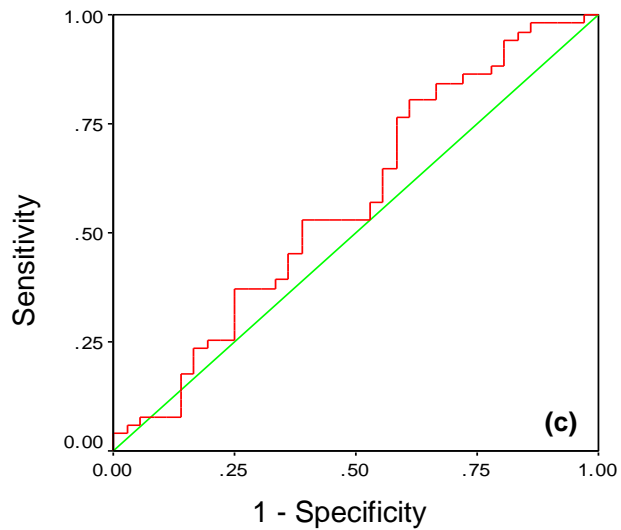

**A $\beta$  (1-40)**

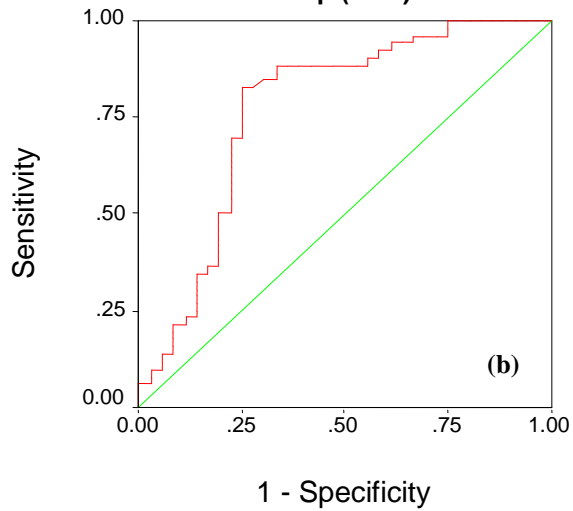

Supplement: MOESM3 [file 9617712]
